# Supplementary material
Source: MDPI journal article supplement (https://www.mdpi.com/2673-1924/4/3/15)
Supplement: s1 [file s1]

**Table S1.** Resume table with results for Dynamic Factor Analysis (DFA), Generalised Least Squares (GLS) and Min/max autocorrelation factor analysis (MAFA), including all explanatory environmental variables related to *M. surmuletus* LPUE in the Northwest, Southwest and South-Algarve regions. Diff. AIC – difference between initial simple DFA model (only with LPUE trend) and DFA with LPUE trend plus explanatory variable. For DFA the – and + sign indicates estimated t-values resulting from estimation of regression parameters with a negative and positive relationship between explanatory variables and response variable (t-values with an absolute value greater than 3 indicate a strong relationship among variables); For MAFA the significance level for correlations (coefficient correlation – Corr. Coef.) of EV with MAFA trend were significant at 0.44 and single MAFA trend (Auto-correlation with time lag 1) explaining 0.59, 0.66 and 0.62 of the trend variability in IXaCN, IXaCS and IXaS-Algarve (all models with 1 MAFA trend were significant:  $P < 0.04$ ). The asterisk (\*) in GLS refers to models that were better fitter with AR model (1,0) – Autogressive model. FE – Fishing Effort; SST – Sea Surface Temperature; UW – Westerly Winds; VW – Northerly winds; WMAG – wind magnitude; UPW – Upwelling; NAO – North Atlantic Oscillation. Combined models were also performed but the results of simple models were overall better, thus they are not showed.

|            | IXaCN – Northwestern |             |             |             |             | IXaCS – Southwestern |              |              |             |              | IXaS– South Algarve |              |              |             |              |
|------------|----------------------|-------------|-------------|-------------|-------------|----------------------|--------------|--------------|-------------|--------------|---------------------|--------------|--------------|-------------|--------------|
|            | DFA                  |             | GLS         |             | MAFA        | DFA                  |              | GLS          |             | MAFA         | DFA                 |              | GLS          |             | MAFA         |
|            | AIC                  | t-value     | slope       | p-value     | Corr. Coef. | AIC                  | t-value      | slope        | p-value     | Corr. Coef.  | AIC                 | t-value      | slope        | p-value     | Corr. Coef.  |
| Initial    | 64.57                | –           | –           | –           |             | 54.69                | –            |              |             |              | 65.259              | –            |              |             |              |
| FE         | 66.23                | –1.28       | –0.04       | 0.86        | –0.04       | <b>55.85</b>         | <b>3.78</b>  | <b>0.56</b>  | <b>0.01</b> | <b>0.56</b>  | 66.14               | –1.07        | –0.18        | 0.44        | –0.18        |
| SST        | 66.20                | –0.75       | 0.02        | 0.92        | 0.02        | 56.69                | –0.67        | 0.10         | 0.66*       | –0.09        | <b>63.83</b>        | <b>2.20</b>  | 0.37         | 0.09        | 0.37         |
| NAO        | 65.08                | –0.31       | –0.10       | 0.65        | –0.10       | 54.81                | 3.31         | 0.26         | 0.1862*     | <b>0.47</b>  | 66.79               | 0.89         | 0.16         | 0.49        | 0.16         |
| <b>UPW</b> | <b>59.66</b>         | <b>2.87</b> | <b>0.53</b> | <b>0.01</b> | <b>0.53</b> | 56.56                | –0.97        | –0.18        | 0.44        | –0.18        | 66.60               | 0.95         | 0.17         | 0.47        | 0.17         |
| UW         | 65.50                | –1.22       | –0.22       | 0.33        | –0.22       | <b>53.18</b>         | <b>–4.04</b> | <b>–0.54</b> | <b>0.01</b> | <b>–0.54</b> | <b>61.68</b>        | <b>–2.36</b> | <b>–0.46</b> | <b>0.04</b> | <b>–0.46</b> |
| VW         | 66.43                | 0.20        | 0.04        | 0.86        | 0.04        | 56.09                | –0.55        | 0.17         | 0.45*       | –0.04        | 67.24               | –0.16        | –0.03        | 0.90        | –0.03        |
| UPW–spring | 66.44                | –0.37       | –0.08       | 0.73        | –0.08       | 56.65                | –1.32        | –0.22        | 0.34        | –0.22        | 66.70               | 0.60         | 0.10         | 0.66        | 0.10         |

|                 |       |       |       |      |       |  |              |              |              |             |              |  |              |              |       |         |       |
|-----------------|-------|-------|-------|------|-------|--|--------------|--------------|--------------|-------------|--------------|--|--------------|--------------|-------|---------|-------|
| UPW-su<br>mmer  | 64.70 | -1.23 | -0.20 | 0.40 | -0.20 |  | 56.15        | -3.50        | <b>-0.52</b> | <b>0.02</b> | <b>-0.52</b> |  | <b>64.46</b> | <b>-1.50</b> | -0.31 | 0.17    | -0.31 |
| UW-spr<br>ing   | 66.42 | -0.02 | -0.01 | 0.98 | -0.01 |  | <b>48.45</b> | <b>-2.24</b> | -0.05        | 0.85        | -0.05        |  | 67.26        | -0.01        | 0.18  | 0.4373* | 0.00  |
| UW-su<br>mmer   | 66.37 | -0.45 | -0.10 | 0.67 | -0.10 |  | 56.65        | -2.62        | -0.41        | 0.07        | -0.41        |  | 66.00        | -0.76        | 0.14  | 0.5785* | -0.16 |
| VW-spri<br>ng   | 65.46 | 1.07  | 0.23  | 0.32 | 0.23  |  | 56.55        | -0.56        | -0.06        | 0.79        | -0.06        |  | 67.13        | 0.28         | 0.05  | 0.83    | 0.05  |
| VW-su<br>mmer   | 65.66 | -0.97 | -0.21 | 0.37 | -0.21 |  | 55.45        | -1.78        | -0.24        | 0.30        | -0.24        |  | 66.80        | 0.46         | 0.08  | 0.74    | 0.08  |
| WMAG            | 66.13 | -0.68 | -0.13 | 0.58 | -0.13 |  | 56.48        | -0.28        | -0.08        | 0.74        | -0.08        |  | 66.01        | -1.29        | -0.21 | 0.36    | -0.21 |
| WMAG<br>-spring | 66.27 | -0.55 | -0.12 | 0.61 | -0.12 |  | 56.24        | 0.84         | 0.10         | 0.67        | 0.10         |  | 67.03        | -0.41        | 0.23  | 0.2057* | -0.07 |
| WMAG<br>-summer | 65.68 | 0.96  | 0.20  | 0.38 | 0.20  |  | 56.68        | 0.65         | 0.11         | 0.65        | 0.11         |  | 66.46        | -1.04        | -0.18 | 0.44    | -0.18 |

---
